# Supplementary material for: Meiosis-Specific Cohesin Component, Stag3 Is Essential for Maintaining Centromere Chromatid Cohesion, and Required for DNA Repair and Synapsis between Homologous Chromosomes
Source: PLOS journal article supplement (doi:10.1371/journal.pgen.1004413), 2014-07-03
Supplement: S10 (10.1371/journal.pgen.1004413.s010) [file journal.pgen.1004413.s010]

**Supplementary Table S1:** Fertility tests for Stag3 mutants and controls

| Genotype                        | Sex    | Number tested | Avg. #pups |
|---------------------------------|--------|---------------|------------|
| <i>Stag3</i> <sup>+/OV</sup>    | Male   | 6             | 10.4       |
| <i>Stag3</i> <sup>OV/OV</sup>   | Male   | 6             | 0          |
| <i>Stag3</i> <sup>+/OV</sup>    | Female | 6             | 11.1       |
| <i>Stag3</i> <sup>OV/OV</sup>   | Female | 6             | 0          |
| <i>Stag3</i> <sup>+/JAX</sup>   | Male   | 4             | 7.7        |
| <i>Stag3</i> <sup>JAX/JAX</sup> | Male   | 2             | 0          |
| <i>Stag3</i> <sup>+/JAX</sup>   | Female | 4             | 7.3        |
| <i>Stag3</i> <sup>JAX/JAX</sup> | Female | 2             | 0          |
| <i>Stag3</i> <sup>JAX/OV</sup>  | Male   | 2             | 0          |
| <i>Stag3</i> <sup>JAX/OV</sup>  | Female | 2             | 0          |
